# Supplementary material
Source: publisher figshare collection journal article supplement (https://tandf.figshare.com/ndownloader/files/12404096)
Supplement: Supplementary file 1 [file 12404096]

Synthesis, Characterization, Spectroscopy, X-ray structure and Gaussian hybrid computational investigation of (−)-(S)-1-[2-(benzenesulfonamido)-3-phenylpropanoyl]-4-[(4-methyl)phenyl]thiosemicarbazide

SIBEL DEMIR KANMAZALP,*,a EYÜP BAŞARAN,b AYŞEGÜL KARAKÜÇÜK-IYIDOĞAN,b EMINE ELÇIN ORUÇ-EMRE,b FATIH ŞEN,c necmI dege,d

aTechnical Sciences, Gaziantep University, 27310, Gaziantep, Turkey

bDepartment of Chemistry, Faculty of Science and Arts, Gaziantep University, 27310, Gaziantep, Turkey

cKilis 7 Aralık University, Vocational High School of Health Services, Department of Opticianry, 79000-Kilis, Turkey

dDepartment of Physics, Faculty of Arts and Sciences, Ondokuz Mayıs University, TR-55139 Kurupelit-Samsun, Turkey

Email: [sibeld@gantep.edu.tr](mailto:sibeld@gantep.edu.tr)

**Supplemental Materials**

# **Figure S 1** The calculated [DFT/B3LYP/6-31G(d, p) and DFT/B3LYP/6-31G+(d, p) levels] and experimental FT-IR spectra of the title compound (cm-1).

# **Figure S2** Correlation graphic of calculated and experimental vibrational frequencies of title compound (cm-1).

**Figure S 3** a) 1H-NMR and b) 13C-NMR spectra of the title compound.

| **a)** |
| --- |
| 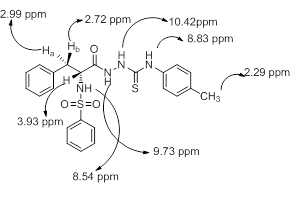**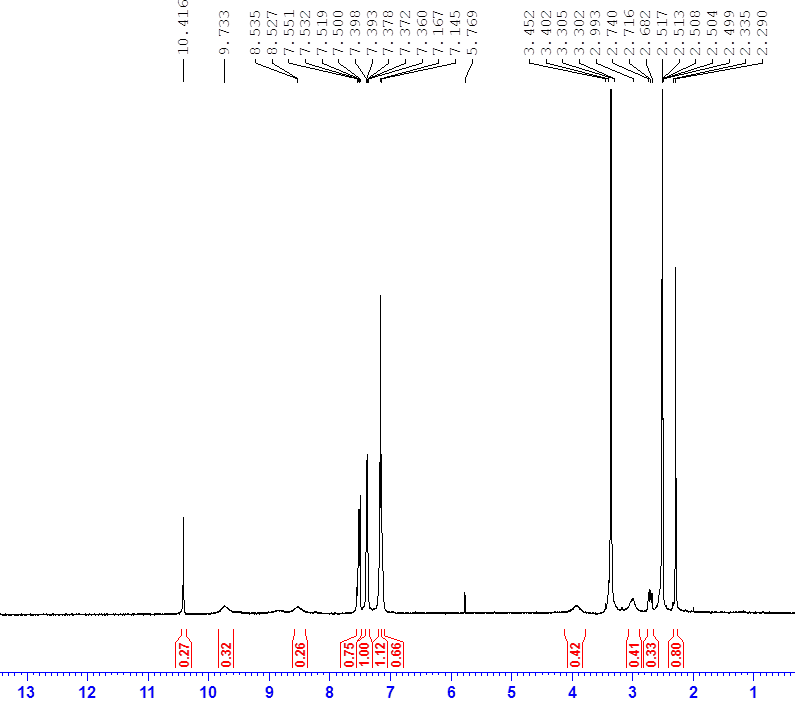** |
| 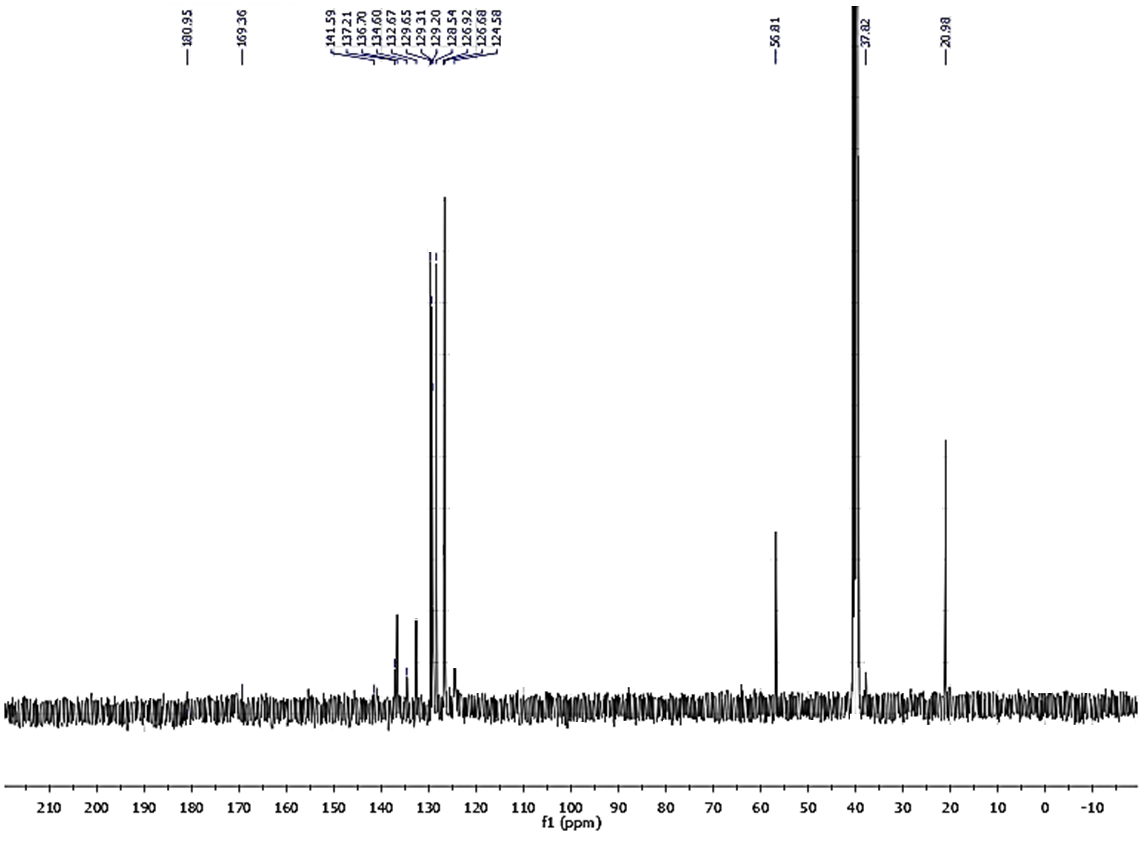**b)**  **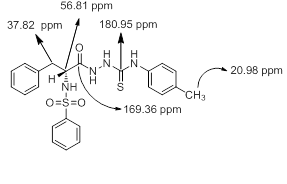** |

**
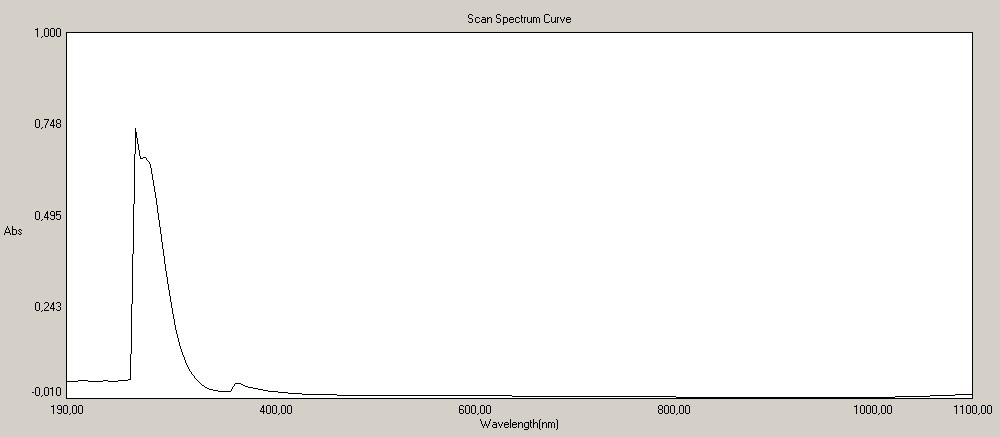
**

**Figure S 4** Experimental UV-Vis spectra of the title compound.
